# Supplementary material
Source: PubMed Central journal article supplement (PMC2741279)
Supplement: 0906781106_0906781106SI.pdf [file 0906781106_0906781106SI.pdf]

# Supporting Information

Mullins et al. 10.1073/pnas.0906781106

## SI Text

**Detection of Calcium Binding by  $^{45}\text{Ca}^{2+}$  Overlay.** The  $^{45}\text{CaCl}_2$  (1 mCi, 37 MBq) was obtained from NEN. The general method of  $^{45}\text{Ca}^{2+}$  overlay has been described in detail elsewhere (1). Our specific conditions were as follows: Purified GST-fusion peptides (2 and 10  $\mu\text{g}$  per lane) and CaM (0.5  $\mu\text{g}$  per lane) were transferred to a PVDF membrane after 13% SDS PAGE. The blot was extensively washed for  $3 \times 10$  min with binding buffer (60 mM KCl, 5 mM  $\text{MgCl}_2$ , and 10 mM imidazole-HCl, pH 6.8) to remove electrode buffer. The overlay assay was performed by incubating the blot with 8.8  $\mu\text{M}$   $^{45}\text{CaCl}_2$  (10 mCi/mg; NEN) in 20 mL of binding buffer at 25 °C for 1 h, followed by  $3 \times 2$ -min washes in  $\text{dH}_2\text{O}$  and a 2 min wash in 50% ethanol. After air drying, the blot was exposed to Hyperfilm (GE Healthcare). After autoradiography the blot was stained in 40% methanol, 10% acetic acid, and 0.1% Coomassie brilliant blue R250, and destained in 20% methanol and 7% acetic acid.

**Primers Used in Generating Constructs.** *Cherry-STIM1*<sub>1–448</sub>. Forward, CTGGCATCCACTAAGTGGTGGCTGC; reverse, gCAGC-CACCAGTTAGTGGATGCCAG.

*GFP-STIM1*<sub>1–469</sub>. Forward, CGCCCCAACCCCTGCTTAGT-TCATCATGACTGAC; reverse, GTCAGTCATGATGAAC-TAAGCAGGGTTGGGGCG.

*GFP-STIM1*<sub>1–491</sub>. Forward, CCCTTGTCATGCAGTGAC-CTAGCCTGCAGAGC; reverse GCTCTGCAGGCTAGGT-CACTGCATGGACAAGGG.

*GFP-STIM1*<sub>1–513</sub>. Forward, CATGGCTGGATCTCAGTAG-GATTTGACCCATTCC; reverse, GGAATGGGTCAAATC-CTACTGAGATCCCAGGCCATG.

*GFP-STIM1*<sub>1–560</sub>. Forward, GGCAGCCACCGGTGATCTA-GGGGGTCCACCCAGGG; reverse, CCCTGGGTGGAC-CCCCTAGATCAGCCGGTGGCTGCC.

*GFP-STIM1*<sub>1–630</sub>. Forward, GACACACCATCTCCAGTTTAG-GACAGCCGAGCCCTG; reverse, CAGGGCTCGGCTGTC-CTAAACTGGAGATGGTGTGTC.

*Cherry-STIM1*<sub>1–672</sub>. Forward, GACTCCAGCCCAGGCTGAAA-GAAGTTTCTCTC; reverse, GAGAGGAAACTTCTT-TCAGCCTGGGCTGGAGTC.

*YFP-STIM1*<sub>234–448</sub>. Forward, AACCGTTACTCCAAGGAGCAC; reverse, GAATTCAGTGGATGCCAGGGTTGTTG.

*YFP-STIM1*<sub>342–469</sub>. Forward, GGATCCATGTATGCTCCAGAG-GCCCTTC; reverse, TCAAGCAGGGTTGGGGCGTG-TACTGCC.

*YFP-STIM1*<sub>342–560</sub>. Forward, GGATCCATGTATGCTCCAGAG-GCCCTTC; reverse, TCAGATCAGCCGGTGGCTGCCATT-GGAAGT.

*YFP-STIM1*<sub>342–630</sub>. Forward, GGATCCATGTATGCTCCAGAG-GCCCTTC; reverse, TCAAAGTGGAGATGGTGTGTCTGG.

*myc-STIM1 478,481 DD* → GG. Forward, ATGACTGACGACGT-GGGTGACATGGGTGAGGAGATTGTGTCTCCC; reverse, GGGAGACACAATTCCTCACCCATGT-CACCCACGTCGTCAGTCAT.

*myc-STIM1 4A2G (from myc-STIM1 478,481 DD)* → GG. Forward, CACT-TCATCATGACTGCCGCCGTGGGTGACAT-GGGTGCGGCGATTGTGTCTCCC; reverse, GGGAGACA-CAATCGCCGCACCCATGTACCCACGGCGGCAGTCA-TGATGAAGTG.

*GFP-STIM1 475/476 DD* → AA. Forward, CACTTCATCATGACT-GCAGcCGTGGATGACATGGAT; reverse, ATCCATGT-CATCCACGGCTGCAGTCATGATGAAGTG.

*GFP-STIM1 482,483 EE* → AA. Forward, GACGTGGATGACATG-GATGCGGCGATTGTGTCTCCCTTG; reverse, CAAGG-GAGACACAATCGCCGCATCCATGTCATCCACGTC.

*Orai1*<sub>1–91</sub> (in *myc-Orai1* and *GFP-myc-Orai1*). Forward, CTAAAGC-CTCAGCCGGTGATCGGCTGTCTCTCC; reverse, GGAGAGCAGAGCCGATCACCCTGCGAGGCTTTAAG.

*Orai1 A73E (in myc-Orai1 and GFP-myc-Orai1<sub>1–91</sub>)*. Forward, GAG-CACTCCATGCAGGAGCTGTCTGGCGCAAG; reverse, CTGCGCCAGGACAGCTCCTGCATGGAGTGCTC.

*Orai1 W76E (in myc-Orai1 and GFP-myc-Orai1<sub>1–91</sub>)*. Forward, ATG-CAGGCGCTGTCCGAGCGCAAGCTCTACTTG; reverse, CAAGTAGAGCTTGCCTCGGACAGCGCCTGCAT.

*Orai1 Y80E (in myc-Orai1 and GFP-myc-Orai1<sub>1–91</sub>)*. Forward, TCCTG-GCGCAAGCTCGAGTTGAGCCGCGCCAAG; reverse, CT-TGGCGCGGCTCAACTCGAGCTTGCGCCAGGA.

*Orai1 W76A (in myc-Orai1 and GFP-myc-Orai1<sub>1–91</sub>)*. Forward, ATG-CAGGCGCTGTCCGCGCGCAAGCTCTACTTG; reverse, CAAGTAGAGCTTGCCTCGGACAGCGCCTGCAT.

*Orai1 W76S (in myc-Orai1 and GFP-myc-Orai1<sub>1–91</sub>)*. Forward, ATG-CAGGCGCTGTCCAGTTCGCAAGCTCTACTTG; reverse, CAAGTAGAGCTTGCCTCGGACAGCGCCTGCAT.

*Orai1 Y80A (in myc-Orai1 and GFP-myc-Orai1<sub>1–91</sub>)*. Forward, TCCTG-GCGCAAGCTCGGTTGAGCCGCGCCAAG; reverse, CT-TGGCGCGGCTCAACGCGAGCTTGCGCCAGGA.

*Orai1 Y80S (in myc-Orai1 and GFP-myc-Orai1<sub>1–91</sub>)*. Forward, TCCTG-GCGCAAGCTCAGTTTGTAGCCGCGCCAAG; reverse, CT-TGGCGCGGCTCAACTGAGCTTGCGCCAGGA.

*Calmodulin (CaM)*. Forward, GCCACCATGGCTGATCAGCT-GACTGAAGAACAG; reverse, GGATCCTCATTTTG-CAGTCATCATCTGTAC.

*CaM-T27C*. Forward, AAGGATGGAGATGGCTGTATCAC-CACCAAGGAG; reverse, CTCCTTGGTGGTGATACAGC-CATCTCCATCCTT.

*STIM1*<sub>470–491</sub>. Forward, GGATCCATGCACTTCATCATGACT-GACGAGTG; reverse, TCACTGCATGGACAAGGGAGA-CAC.

1. Maruyama K, Mikawa T, Ebashi S (1984) Detection of calcium binding proteins by  $^{45}\text{Ca}$  autoradiography on nitrocellulose membrane after sodium dodecyl sulfate gel electrophoresis. *J Biochem* 95:511–519.







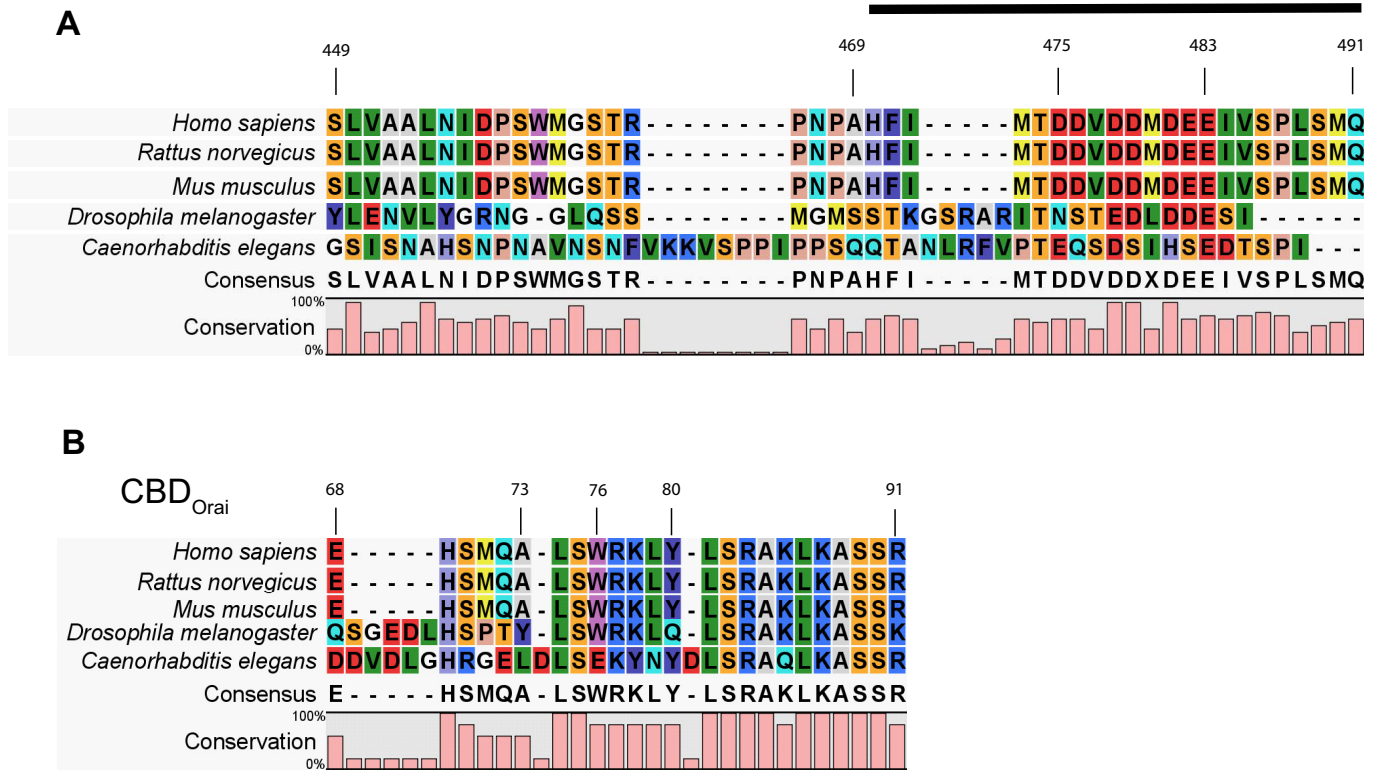

**Fig. S4.** Alignment of ID<sub>STIM</sub> and CBD<sub>Orai</sub> sequences. (A) Full-length STIM1 amino acid sequences from vertebrate and invertebrate species were aligned with CLC Sequence Viewer version 5 using default settings. The region corresponding to amino acids 449–491 of human STIM1 is shown, and the ID<sub>STIM</sub> (amino acids 470–491) is annotated (bar). The degree of conservation for each position is shown at the bottom. Although a high degree of sequence conservation is seen in this region among vertebrates, greater variability is seen among invertebrates, leading to the introduction of several gaps. (B) Full-length Orai1 amino acid sequences from vertebrate and invertebrate species were aligned with CLC Sequence Viewer version 5 using default settings. The region corresponding to amino acids 68–91 of human Orai1 is shown. The degree of conservation for each position is shown at the bottom. The residues A73, W76, and Y80, all key for inactivation (Fig. 4), are highly conserved in vertebrates, but variable among invertebrates.

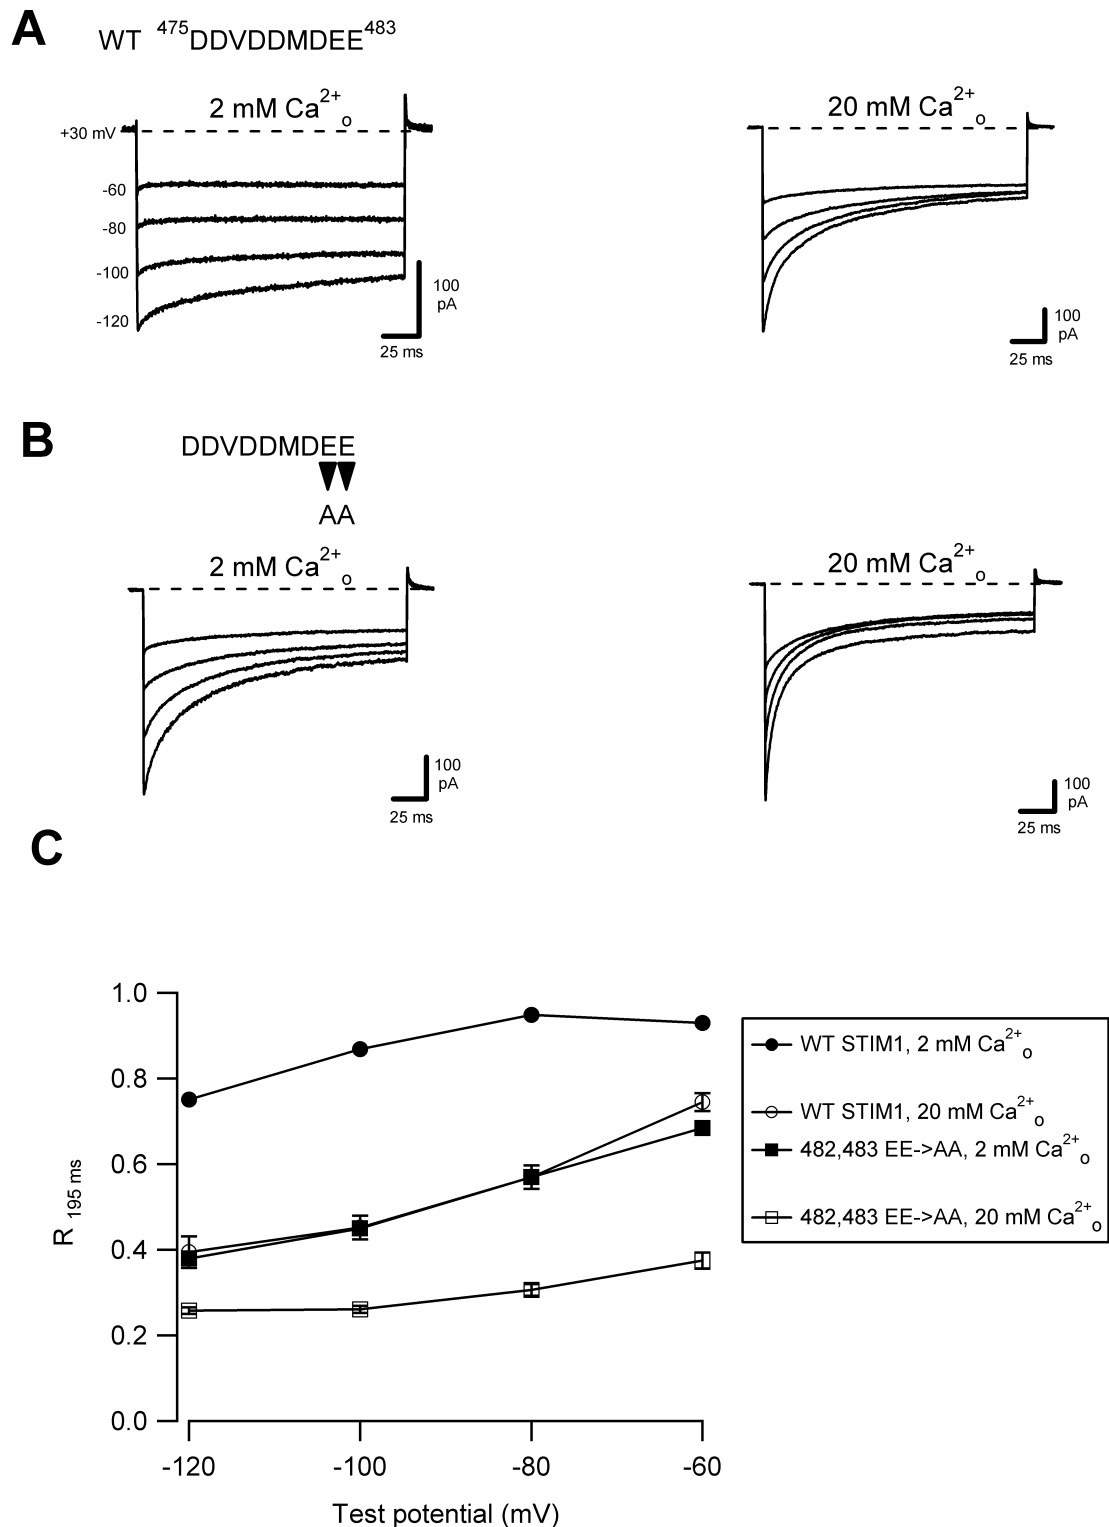

**Fig. S5.** The 482/483 EE → AA mutation in STIM1 increases the calcium sensitivity of  $I_{CRAC}$  inactivation. Currents were recorded in HEK293 cells cotransfected with myc-Orai1 and the indicated STIM1-derived construct, after induction of  $I_{CRAC}$  reached a maximum. (A) Representative currents evoked by WT GFP-STIM1 recorded in 2 (Left) or 20 (Right) mM  $Ca^{2+}_o$  during pulses to the indicated voltages. Traces in 20 mM  $Ca^{2+}_o$  are reproduced from Fig. 1 A. (B) Representative currents evoked by STIM1 482/483 EE → AA recorded in 2 (Left) or 20 (Right) mM  $Ca^{2+}_o$ . Note the presence of strong inactivation even in low  $[Ca^{2+}]_o$ , unlike the WT traces in A. Traces in 20 mM  $Ca^{2+}_o$  are reproduced from Fig. 2 E. (C) Extent of inactivation for WT and 482/483 EE → AA plotted against test potential. Each point represents the mean  $\pm$  SEM of five cells (WT, 20 mM  $Ca^{2+}_o$ ) or 7 cells (482/483 EE → AA, 20 mM  $Ca^{2+}_o$ ). For 2 mM  $Ca^{2+}_o$ ,  $n = 1$  cell for both constructs.

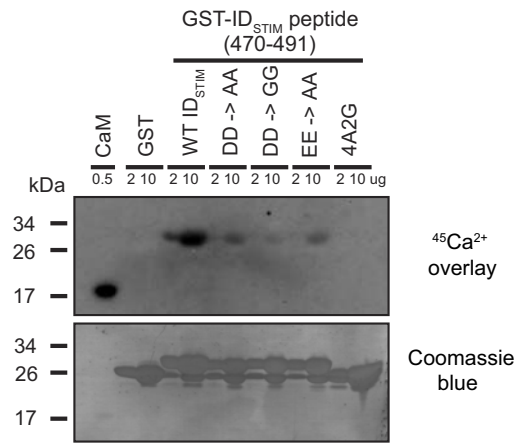

**Fig. S6.** Ca<sup>2+</sup> binding to the ID<sub>STIM</sub> domain detected by <sup>45</sup>Ca<sup>2+</sup> overlay. Purified CaM (0.5 μg) and GST (2 and 10 μg) were loaded for controls. WT and mutant GST-STIM1 peptides corresponding to amino acids 470–491 were tested. (Upper) CaM, WT GST-ID<sub>STIM</sub> 470–491, and GST-fused peptides in which 2 aa were mutated were able to bind to Ca<sup>2+</sup> to variable degrees. No Ca<sup>2+</sup> binding was detected for GST or the 4A2G mutant. (Lower) Coomassie staining shows loaded proteins.

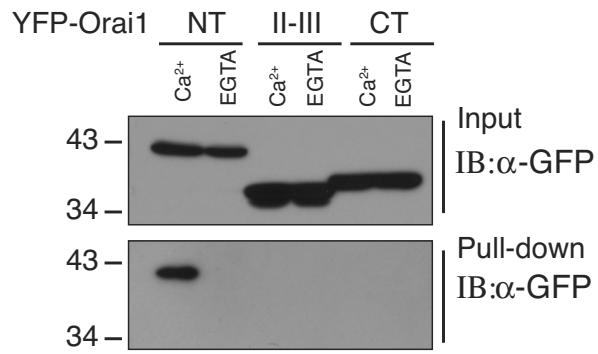

**Fig. S7.** CaM Sepharose pull-down confirming Ca<sup>2+</sup>-dependent binding of CaM to the Orai1 N terminus. Lysates from HEK 293T cells expressing YFP-tagged N-terminal, II-III loop, and C-terminal fragments of Orai1 were applied to CaM-Sepharose in the presence of 2 mM Ca<sup>2+</sup> or 4 mM EGTA.
